# Supplementary material for: SARS-CoV-2 (COVID-19) by the numbers
Source: eLife journal article supplement (doi:10.7554/elife.57309), 2020-03-31
Supplement: supp1 [file elife-57309-supp1-v4.pdf]

# SARS-CoV-2 (COVID-19) by the numbers

Yinon M. Bar-On<sup>1</sup>, Avi Flamholz<sup>2</sup>, Rob Phillips<sup>3,4</sup>, and Ron Milo<sup>1\*</sup>

<sup>1</sup>Weizmann Institute of Science, Rehovot 7610001, Israel <sup>2</sup>University of California, Berkeley, CA 94720, USA

<sup>3</sup>California Institute of Technology, Pasadena, CA 91125, USA <sup>4</sup>Chan Zuckerberg Biohub, San Francisco, CA 94158, USA

\*Corresponding author: [ron.milo@weizmann.ac.il](mailto:ron.milo@weizmann.ac.il).

Comments are welcome; this article is being updated on an ongoing basis at: <https://bit.ly/2WOeN64>

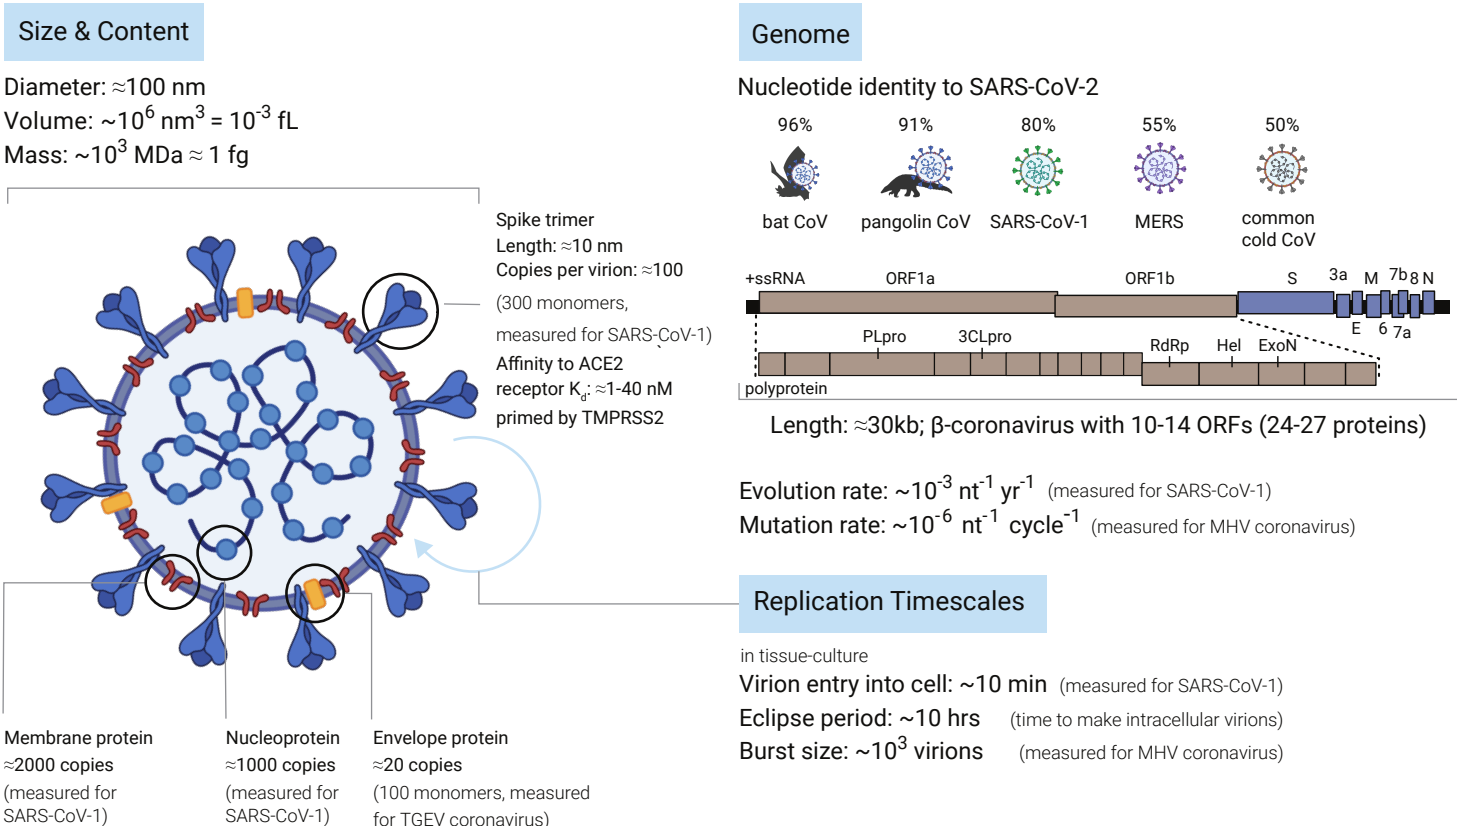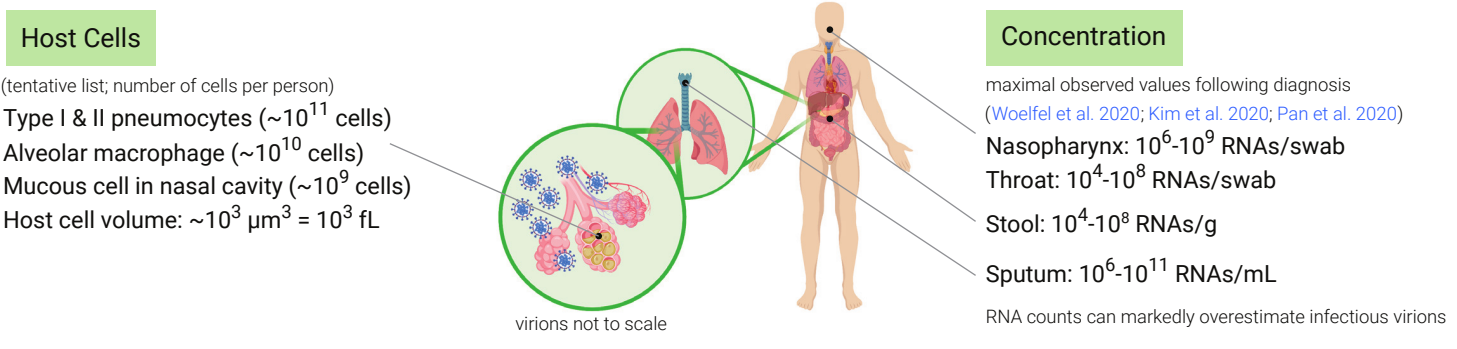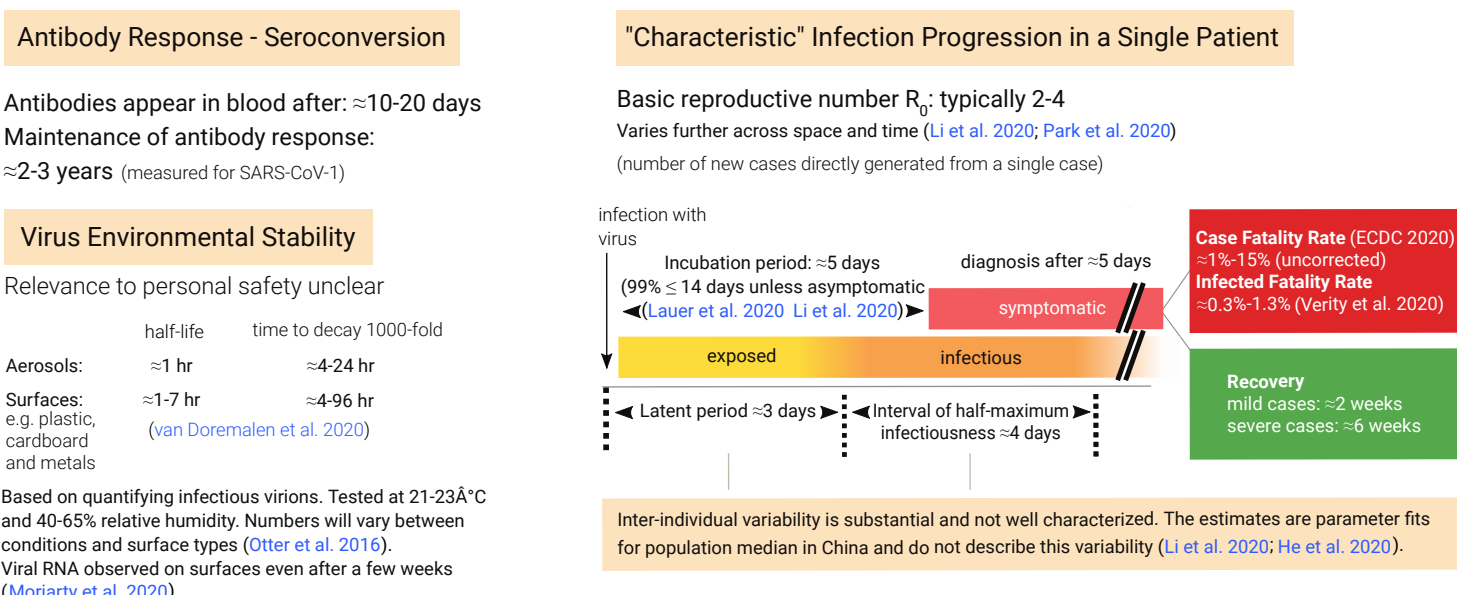

Note the difference in notation between the symbol  $\approx$ , which indicates "approximately" and connotes accuracy to within a factor 2, and the symbol  $\sim$ , which indicates "order of magnitude" or accuracy to within a factor of 10.
